1 Genomic resolution of cryptic species diversity in chipmunks

2

3 Nathanael D. Herrera<sup>1</sup>, Kayce C. Bell<sup>2</sup>, Colin M. Callahan<sup>1</sup>, Erin Nordquist<sup>1</sup>, Brice A. J. Sarver<sup>1</sup>,

4 Jack Sullivan<sup>3,4</sup>, John R. Demboski<sup>5</sup>, and Jeffrey M. Good<sup>1,6</sup>

5

6 <sup>1</sup>*Division of Biological Sciences, University of Montana, Missoula, Montana, USA.*

7 <sup>2</sup>*Natural History Museum of Los Angeles County, Los Angeles, California, USA*

8 <sup>3</sup>*Department of Biological Sciences, University of Idaho, Moscow, Idaho, USA*

9 <sup>4</sup>*Institute for Bioinformatics and Evolutionary Studies (IBEST), University of Idaho, Moscow,*  
10 *Idaho, USA*

11 <sup>5</sup>*Department of Zoology, Denver Museum of Nature & Sciences, Denver, Colorado, USA*

12 <sup>6</sup>*Wildlife Biology Program, University of Montana, Missoula, Montana, USA.*

13

14 **Correspondence:** Nathanael D. Herrera [ndh04c@gmail.com](mailto:ndh04c@gmail.com); Jeffrey M. Good,

15 [jeffrey.good@umontana.edu](mailto:jeffrey.good@umontana.edu)

16 **ABSTRACT**

17 Discovery of cryptic species is essential to understanding the process of speciation and assessing  
18 the impacts of anthropogenic stressors. Here, we used genomic data to test for cryptic species  
19 diversity within an ecologically well-known radiation of North American rodents, western  
20 chipmunks (*Tamias*). We assembled a *de novo* reference genome for a single species (*Tamias*  
21 *minimus*) combined with new and published targeted sequence-capture data for 21,551  
22 autosomal and 493 X-linked loci sampled from 121 individuals spanning 22 species. We  
23 identified at least two cryptic lineages corresponding with an isolated subspecies of least  
24 chipmunk (*T. minimus griseescens*) and with a restricted subspecies of the yellow-pine chipmunk  
25 (*T. amoenus cratericus*) known only from around the extensive Craters of the Moon lava flow.  
26 Additional population-level sequence data revealed that the so-called Crater chipmunk is a  
27 distinct species that is abundant throughout the coniferous forests of southern Idaho. This cryptic  
28 lineage does not appear to be most closely related to the ecologically and phenotypically similar  
29 yellow-pine chipmunk but does show evidence for recurrent hybridization with this and other  
30 species.

31

32 **KEYWORDS**

33 speciation; hybridization; introgression; phylogenomics; *Tamias*; *Neotamias*

34

## 35 INTRODUCTION

36 Species are fundamental units of biodiversity, yet the basic task of species discovery often  
37 remains incomplete, even in well-studied taxonomic groups. Whereas some of these difficulties  
38 stem from philosophical disagreements on species delimitation (de Queiroz 2007), a far more  
39 important source of uncertainty involves the misidentification of cryptic lineages that are  
40 phenotypically or ecologically similar to known species (Bickford et al. 2007; Struck et al.  
41 2018). Identifying cryptic diversity is fundamental to understanding both the process of  
42 speciation and the conservation of species. The emerging threats of accelerated climate change  
43 and habitat loss have only increased the urgency of discovering and more fully accounting for  
44 patterns of global biodiversity (Bickford et al. 2007; Delic et al. 2017).

45 Species delimitation has historically relied on morphological differences. However,  
46 molecular data provide evidence that morphological divergence does not always coincide with  
47 reproductive isolation. Moreover, the evolutionary history of speciation can be further obscured  
48 by hybridization and introgression (Lamichhaney et al. 2017; Fišer et al. 2018). Over the past  
49 decade, both theoretical and methodological approaches for genetically based species  
50 delimitation have seen considerable progress (Yang and Rannala 2010; Fujita et al. 2012;  
51 Edwards and Knowles 2014; Mirarab et al. 2014a; Yang 2015; Mirarab et al. 2016; Luo et al.  
52 2018). In conjunction, advances in high-throughput DNA sequencing provide the ability to  
53 reconstruct complex evolutionary histories using sophisticated statistical and phylogenetic  
54 approaches that can detect and quantify the extent of gene flow during speciation (Green et al.  
55 2010; Blischak et al. 2018).

56 Chipmunks of western North America provide a rich system to study speciation and species  
57 delimitation across a rapid diversification characterized by ecological adaptation, phenotypic

58 convergence, and overlapping geographic distributions. Of the 25 or 26 (see Burgin et al. 2018)  
59 currently recognized chipmunk species (Sciuridae: *Tamias*; but see Patterson and Norris 2016),  
60 two are widely distributed lineages occupying central and eastern Asia (*T. sibiricus*) or eastern  
61 North America (*T. striatus*; Hall 1981). The remaining 23 species (subgenus *Neotamias*)  
62 comprise a recent radiation of habitat specialists and generalists occupying the diverse  
63 ecosystems of western North America (Heller 1971; Patterson 1981; Sullivan et al. 2014).  
64 Specialization among chipmunks has resulted in strong niche partitioning by habitat and  
65 competitive exclusion among co-distributed species (Brown 1971; Heller 1971). Although  
66 ecological associations broadly tend to track species boundaries, these associations can break  
67 down in sympatry, with chipmunks that occupy similar or transitory habitats showing phenotypic  
68 convergence (e.g., in size and pelage coloration) between non-sister species. As a consequence,  
69 internal genital bones often provide the only morphological character that is strongly diagnostic  
70 of species boundaries (White 1953). Divergence in genitalia is most pronounced in the male  
71 genital bone, the baculum (*os penis*), which evolves rapidly among chipmunk species (Callahan  
72 1977; Sutton and Patterson 2000; Sullivan et al. 2014) likely due to strong sexual selection  
73 (Eberhard 1985; Simmons 2014). Bacular divergence was long thought to underlie strong  
74 reproductive barriers between chipmunk species (Patterson and Thaler 1982). However, more  
75 recent work has shown that some hybridization occurs between species (see Sullivan et al. 2014  
76 for review). In most cases, levels of nuclear introgression have appeared to be relatively low  
77 overall (but see Ji et al. 2021), with the persistence of genetically well-defined species  
78 boundaries that largely correspond with established taxonomy based on ecological associations  
79 and diagnostic genitalia (Hird and Sullivan 2009; Hird et al. 2010; Good et al. 2015; Bi et al.  
80 2019; Sarver et al. 2021).

81 Genetic studies have also suggested several potential cases of cryptic diversity in this  
82 radiation (Demboski and Sullivan 2003; Reid et al. 2012; Sullivan et al. 2014) and the phylogeny  
83 of western chipmunks remains unresolved. One potential source for cryptic diversity lies within  
84 the widespread least chipmunk (*T. minimus*). For example, *T. m. grisescens* (the Coulee  
85 chipmunk, hereafter *grisescens*) is a small, light gray subspecies of *T. minimus* that occupies a  
86 restricted range from the Channeled Scablands of central Washington that was identified by Reid  
87 and colleagues (2012) as a potential cryptic lineage based on four nuclear loci and mitochondrial  
88 DNA (mtDNA).

89 Another potential example of cryptic diversity occurs within the yellow-pine chipmunk (*T.*  
90 *amoenus*), a widespread species associated with xeric forests throughout western North America.  
91 Blossom (1937) described a subspecies of *Eutamias amoenus* (i.e., the Crater chipmunk, *T.*  
92 *amoenus cratericus*, hereafter *cratericus*) as occurring on the periphery of a series of relatively  
93 recent lava flows (~10 kya) from Craters of the Moon National Monument and surrounding area  
94 of central Idaho. This darker pelage variant of the yellow-pine chipmunk was assumed to reflect  
95 local adaptation on the black lava flows of southern Idaho, with rapid transition to more brightly  
96 colored *T. amoenus* morphs found in adjacent xeric forest habitats of the region (Figure 1).  
97 However, comparison of bacula by White (1953) and Sutton (1982, including the baubellum, the  
98 female genital bone; *os clitoris*), of multiple *Tamias* species concluded that *cratericus* may be  
99 more closely related to other chipmunk species (*T. umbrinus* or *T. ruficaudus*), based on similar  
100 genital morphology and nearby geographic proximity. Finally, the mitochondrial genome  
101 sequenced from *cratericus* appears to be fairly divergent from other species, and has been  
102 detected at an additional locality to the north of Craters of the Moon (Demboski and Sullivan

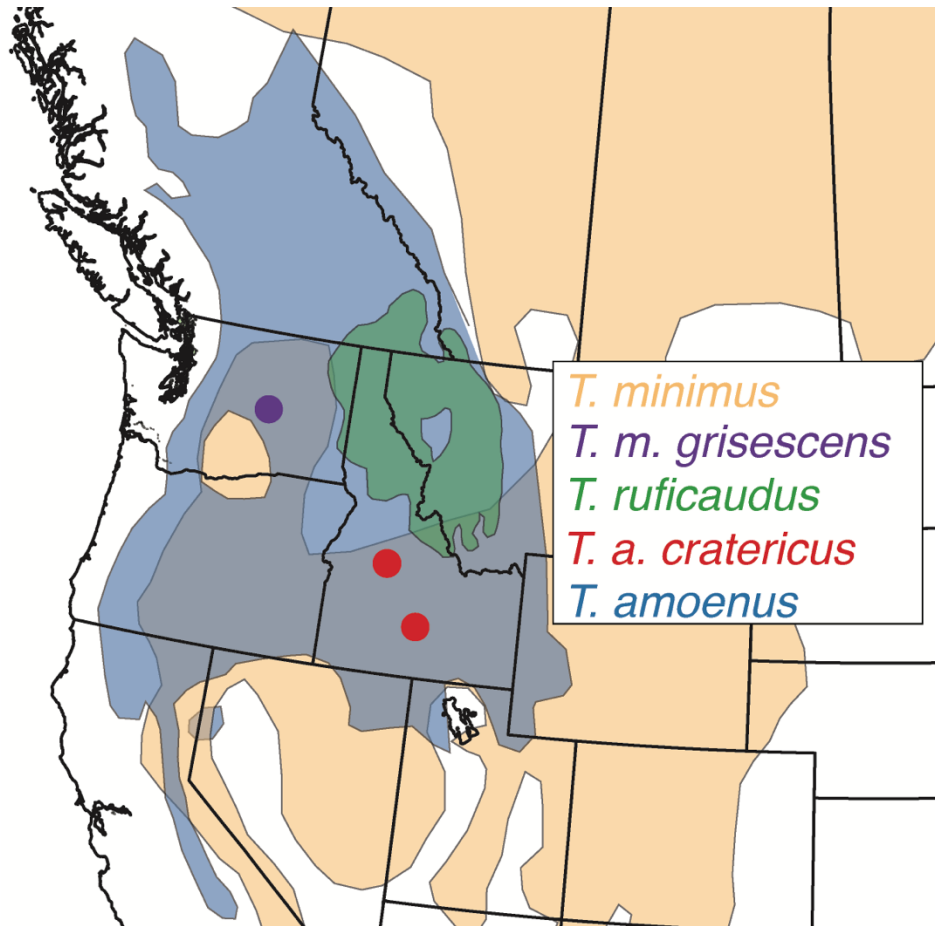

**Figure 1 – Two potential cryptic species of chipmunk.** *T. m. grisescens* (Purple) occupies a restricted range from the Channeled Scablands of central Washington. *T. a. cratericus* (Red) is described as a locally adapted form of the yellow-pine chipmunk (*T. amoenus*).

103 2003) suggesting that *cratericus* may be more widespread (Reid et al. 2012).

104 Here, we use linked-read sequencing to generate a reference genome for the least chipmunk  
105 (*T. minimus*). We then use new and published targeted capture sequencing data from 21,551  
106 autosomal and 493 X-linked loci, and complete mitochondrial genomes to infer the phylogenetic  
107 relationships among 22 described chipmunk species, including the enigmatic *cratericus* and  
108 *grisescens* chipmunks. We then use additional population-level sequencing to characterize the  
109 geographic range and evolutionary history of *cratericus* relative to three other potentially co-  
110 distributed chipmunk species.

111

## 112 MATERIALS AND METHODS

### 113 SAMPLING AND ETHICS STATEMENT

114 To assess genus-wide diversity, we combined extensive fieldwork with collections from several  
115 natural history museums to obtain samples from 14 western chipmunk species and the eastern  
116 chipmunk, *Tamias striatus*, as an outgroup (Supplementary Table S1). We combined data from  
117 these samples with published data (Bi et al. 2019; Sarver et al. 2021) from seven additional  
118 species of western chipmunks resulting in broad sampling covering 22 of the 26 described  
119 species of chipmunk (57 individuals). Not included were samples of *T. solivagus*, *T. durangae*,  
120 and *T. bulleri* (all western chipmunk species endemic to Mexico), and the Eurasian *T. sibiricus*.

121 To better characterize the geographic and ecological extent of *cratericus*, we collected an  
122 additional 64 individuals from 10 populations throughout central Idaho covering a broad range of  
123 habitats from the lava flows of Craters of the Moon up to the subalpine zone. All animals  
124 sampled for this project were collected following procedures approved by the University of  
125 Montana Animal Care and Use Committee (protocol numbers AUP 042-16JGDBS & 022-  
126 10JGDBS). We used acceptable field collecting methods, conducted according to the  
127 recommendations of the American Society of Mammalogists Animal Care and Use Committee  
128 (Sikes and Mammalogists 2016).

129

### 130 GENOME SEQUENCING AND ASSEMBLY

131 Liver tissue from a female *T. minimus* was frozen in liquid nitrogen immediately after euthanasia  
132 and sent to the DNA Technologies and Expression Analysis Core at the UC Davis Genome  
133 Center for DNA extraction and library preparation. High molecular weight genomic DNA was  
134 isolated following Jain et al. (2018). Briefly, 40 mg of flash frozen liver tissue was homogenized

135 by grinding in liquid nitrogen and lysed with 2 ml of lysis buffer containing 10 mM Tris-HCl pH  
136 8.0, 25 mM EDTA, 0.5% (w/v) SDS and 100µg/ml Proteinase K. The lysate was cleaned with  
137 equal volumes of phenol/chloroform using phase lock gels (Quantabio Cat # 2302830). The  
138 DNA was precipitated by adding 0.4X volume of 5M ammonium acetate and 3X volume of ice-  
139 cold ethanol, washed twice with 70% ethanol, and resuspended in buffer (10mM Tris, pH 8.0).  
140 The integrity of the high-molecular-weight genomic DNA was verified on a Pippin Pulse gel  
141 electrophoresis system (Sage Sciences, Beverly, MA). Following DNA isolation, a 10X  
142 Genomics Chromium library was prepared following the manufacturer's protocol and sequenced  
143 on the Illumina HiSeq X platform by Novogene Corporation. We then used Supernova V2.0.0  
144 (Weisenfeld et al. 2017) to generate a *de novo* genome assembly from the 10X Genomics  
145 Chromium library sequence data using default settings with --maxreads=1135000000 (the  
146 number of reads estimated to yield 56× coverage for an estimated genome of ~2.3 Gigabases;  
147 Supplementary Table S2).

148

## 149 **EXON CAPTURE ENRICHMENT AND SEQUENCING**

150 We generated new genome-wide resequencing data from 112 individuals and 15 chipmunk  
151 species (including *T. striatus* as an outgroup; Supplemental Table S1) using a custom in-solution  
152 targeted capture experiment designed by Bi et al. (2019) to enrich and sequence exons (including  
153 flanking introns and intergenic regions) from 10,107 nuclear protein-coding genes [9.4  
154 Megabases (Mb) total and the complete ~16.5 kilobase (kb) mitochondrial genome]. This capture  
155 strategy was iteratively developed from a series of genomic experiments. First, RNA-seq was  
156 used to sequence and assemble transcriptomes from multiple tissue types sampled from a single  
157 chipmunk species (*T. alpinus*), which served as the reference for exome capture probe design (Bi



158 et al. 2012). These transcriptome data were used to develop an array-based capture targeting  
159 ~8,000 nuclear genes as well as the complete mitochondrial genome, resulting in ~6.9 Mb of  
160 assembled exonic regions (including flanking introns and intergenic regions; Bi et al. 2012; Bi et  
161 al. 2013; Good et al. 2015). Finally, an additional ~2.4 Mb of genic regions were identified from  
162 the original transcriptome through AmiGO and NCBI protein databases and were added to the  
163 capture design. Published data from Sarver et al. (2021; *T. canipes*, *T. cinereicollis*, *T. dorsalis*,  
164 *T. quadrivittatus*, *T. rufus*, and *T. umbrinus*) were based on the earlier array-based design and  
165 thus represent an overlapping subset of the genomic regions targeted here.

166 To localize the targeted genomic regions within the *de novo* *T. minimus* genome, we first  
167 used BLAT to identify the best hit in the reference. We then sorted and filtered the contigs to  
168 include only the best match hits, discarding contigs with equally likely hits across the genome.  
169 To identify X-linked contigs in the genome assembly, we calculated the normalized female  
170 versus male ratio of sequencing coverage for targeted regions mapping to each contig, which  
171 should be approximately 2:1 for genes on the X chromosome.

172 Total genomic DNA was isolated from heart or liver tissue using Qiagen DNEasy DNA  
173 blood and tissue kits. Illumina sequencing libraries were prepared for each sample following the  
174 protocol of Meyer and Kircher (2010). Sequencing libraries were then enriched in solution using  
175 probes designed as described above and manufactured by NimbleGen (SeqCap EZ Developer  
176 kits). Hybridization reactions were performed in four separate equimolar pools of indexed  
177 libraries. To assess capture efficiency, we first sequenced a subset of pooled libraries on an  
178 Illumina MiSeq sequencer (150 bp paired-end reads) at the University of Montana genomics core  
179 (Missoula, MT). Final pooled libraries were sequenced on an Illumina HiSeq 2500 (150 bp  
180 paired-end reads) at the University of Oregon (Eugene, OR).

## 181 **ILLUMINA DATA PROCESSING AND GENOTYPING**

182 Raw read data were cleaned using the *HTStream* pipeline (available from  
183 <https://github.com/s4hts/HTStream>; last accessed July 21, 2018), to trim adapters and low-  
184 quality bases, merge overlapping reads, and remove putative PCR duplicates. Cleaned reads  
185 were mapped to the reference genome using the BWA-MEM alignment algorithm as  
186 implemented in BWA v0.7.15 (Li and Durbin 2009; Li 2013) with default options and then  
187 sorted with *samtools* v1.4 (Li et al. 2009). Mapped reads were assigned read groups and  
188 duplicate reads were identified post-mapping using Picard v2.5.0  
189 (<http://broadinstitute.github.io/picard/>). Initial capture efficiency statistics were calculated using  
190 QC3 v1.33 (Guo et al. 2014). Regions with insertions or deletions (indels) were identified and  
191 realigned, and single nucleotide variants (SNVs) were called using UnifiedGenotyper within the  
192 Genome Analysis Toolkit (GATK) v3.6 (McKenna et al. 2010; DePristo et al. 2011; Van der  
193 Auwera et al. 2013) with the EMIT\_ALL\_SITES argument set. This resulted in a final VCF with  
194 a call at every position. We then soft filtered based on minimum mapping quality ( $MQ < 20$ ), a  
195 minimum quality ( $QUAL < 20$ ), a minimum quality by depth ( $QD < 2$ ), and a minimum  
196 sequencing depth ( $DP < 5$ ), resulting in a final filtered single sample VCF file used for all  
197 downstream analyses.

198

## 199 **PHYLOGENETIC INFERENCE AND SPECIES DELIMITATION**

200 To obtain sequence alignments for phylogenetic analyses, we constructed consensus sequences  
201 of the targeted regions using the filtered VCF for each individual by injecting all confidently  
202 called sites back into the original reference using *FastaAlternateReferenceMaker* within the  
203 GATK. IUPAC ambiguity codes were inserted at putative heterozygous positions using the -

204 IUPAC flag. Remaining ambiguous positions (MQ < 20, QUAL < 20, QD < 2, DP < 5) were hard  
205 masked (i.e., replaced with an “N”) using GNU awk and bedtools v2.25 (Quinlan and Hall  
206 2010).

207 We used a two-tiered approach to infer phylogenetic relationships within *Tamias*. First,  
208 we used a concatenated alignment of the targeted regions and 100 base pairs (bp) of flanking  
209 sequence to estimate a single bifurcating phylogeny using a maximum likelihood (ML) search as  
210 implemented in IQ-Tree v.1.5.5 (Nguyen et al. 2015). For all phylogenetic analyses, we ran  
211 separate analyses for autosomal and X-linked regions. We use ModelFinder Plus (-m MFP)  
212 (Kalyaanamoorthy et al. 2017) and Bayesian information criterion (BIC) to select the best  
213 nucleotide substitution model for the concatenated data. To assess nodal support, we performed  
214 1000 ultrafast bootstrap replicates (UFBoot) with the “-bb” command (Minh et al. 2013; Hoang  
215 et al. 2017). Concatenation of multiple loci ignores coalescent stochasticity and can result in  
216 erroneously high bootstrap support for nodes that may show substantial incongruence when  
217 considered on a per locus basis (Kumar et al. 2012). Therefore, we also calculated gene  
218 concordance factors (gCF) and site concordance factors (sCF) as implemented in IQ-Tree v.  
219 2.0.6 (Minh et al. 2020a; Minh et al. 2020b). Gene concordance factors are the proportion of  
220 inferred single locus trees (gene trees) that support a particular branch in the reference tree (ML  
221 concat tree), whereas site concordance factors are the proportion of sites within the concatenated  
222 alignment that support a branch in the reference tree.

223 To obtain gene trees, we extracted alignments from the targeted regions and 100 bp of  
224 flanking sequence by combining all targets found within stepped 50 kb intervals using bedtools  
225 v2.2.5 and combined regions by scaffold using AMAS (Borowiec 2016). This approach was  
226 chosen to capture the spatial distribution of individual targets while ensuring we include enough

227 informative sites to infer independent phylogenetic histories. Although interval size is somewhat  
228 arbitrary here, we considered a range of interval sizes and found smaller intervals ( $\leq 10$  kb)  
229 resulted in many intervals without targets and few informative sites. Likewise, much larger  
230 interval sizes ( $\geq 100$  kb) were more likely to conflate independent phylogenetic histories. For  
231 each interval, we filtered positions with missing data for  $>85\%$  of individuals using AMAS and  
232 excluded intervals containing less than 1 kb of capture data. We then used IQ-Tree v.1.5.5 to  
233 estimate local maximum likelihood trees with 1000 ultra-fast bootstraps (using -m MFP, -bb  
234 1000), with *T. striatus* as the outgroup. Gene trees, when necessary, were unrooted using the R  
235 package *ape* (Paradis et al. 2004). We then used unrooted gene trees to estimate a consensus  
236 species tree using ASTRAL-III v5.6.3 (Zhang et al. 2018). Assuming sets of independent and  
237 accurately estimated gene trees, ASTRAL estimates an unrooted species tree by finding the  
238 species tree that has the maximum number of shared induced quartet trees with the given set of  
239 gene trees (Mirarab et al. 2014a; Mirarab et al. 2014b).

240       Next, we estimated coalescent-based species trees with SVDquartets (Chifman and  
241 Kubatko 2014) using 100,000 random quartets and 100 bootstrap replicates as implemented in  
242 PAUP\* v4.0a166 (Swofford 2003). SVDquartets assesses support for quartets of taxa directly  
243 from site-pattern frequencies of variable sites only. This approach differs from summary  
244 methods, such as ASTRAL, because it does not independently estimate gene trees, avoiding the  
245 issue of gene-tree estimation error (Chifman and Kubatko 2015; Chou et al. 2015). For  
246 SVDquartets, we extracted single nucleotide variants (SNVs) distanced at least 10 kb along the  
247 genome and excluded sites with missing information for  $>85\%$  of the individuals. For both  
248 SVDquartets and ASTRAL analyses, species trees were estimated with and without assigning  
249 species identities and using sites or intervals for autosomal and X-linked loci separately as

250 previously described. When applicable, we included the eastern chipmunk, *T. striatus*, as the  
251 outgroup.

252 Finally, we estimated a species tree using the Bayesian program BPP version 4.4.1  
253 (Rannala and Yang 2017; Flouri et al. 2018). BPP uses a full likelihood-based implementation of  
254 the multispecies coalescent and accommodates uncertainty due to gene tree heterogeneity (both  
255 the topology and branch lengths) and incomplete lineage sorting. We first performed preliminary  
256 runs using a diffuse prior (shape parameter  $\alpha=3$ ) to assess the fit of the prior means with our data.  
257 For our model parameters, we assigned inverse-gamma priors to the population size parameter  $\theta$   
258 [ $\sim$ IG (3, 0.002) with mean 0.00], and to the divergence times  $\tau$  [ $\sim$ IG (3, 0.01) with mean 0.005  
259 for the age of the root]. We assessed convergence based on consistency across 5 replicate  
260 MCMC runs, using a different starting tree and seed for each. For each run, we generated  
261 200,000 samples with a sample frequency of two iterations after a burn-in of 16,000 iterations.  
262 While BPP can potentially analyze 1000's of genetic loci, we found that runtimes were excessive  
263 even with our relatively modest genome-wide capture dataset. Therefore, we explored several  
264 pruning options and settled on selecting the largest contig with a minimum interval distance of 1  
265 Mb. This resulted in a sequence alignment consisting of 88 loci (ranging in size from  $\sim$ 1,000-  
266 4,600 bp; median 2,343 bp) for a total alignment length of 209,725 bp.

267

## 268 **INFERENCE OF POPULATION STRUCTURE**

269 We plotted PC1 and PC2 from a principal components analysis (PCA) using the R package  
270 SNPRelate (Zheng et al. 2012). To estimate individual co-ancestry, we performed ML estimation  
271 of individual admixture proportions using the program ADMIXTURE v.1.30 (Alexander et al.  
272 2009). We tested values of K (the number of population clusters) ranging from 1-6 under the

273 default settings in ADMIXTURE and selected the model with the lowest cross-validation error.  
274 For both PCA and population cluster analyses, we used a filtered SNP dataset where we applied  
275 LD-based pruning to filter our SNP dataset using PLINK v1.9 (Chang et al. 2015) to minimize  
276 non-independence due to linkage. We used a 1 kb sliding window with a step size of 100 bp and  
277 pairwise  $r^2$  of 0.8 as a cut-off for removing highly linked SNPs. This resulted in a final set of  
278 93,247 SNPs.

279

## 280 **INTROGRESSION AND PHYLOGENETIC NETWORKS**

281 An advantage of SVDquartets is that it detects deviations in site-pattern frequencies expected  
282 under the multi-species coalescent by evaluating support for all three resolutions for each quartet,  
283 similar to the ABBA-BABA test (Green et al. 2010; Durand et al. 2011). Therefore, we used the  
284 software package HyDe (Blischak et al. 2018) to test for hybridization using the invariants  
285 framework of SVDquartets. Here, the quartet with the majority of the support should correspond  
286 to the species tree. With incomplete lineage sorting (ILS) and in the absence of introgression, the  
287 two minor quartet topologies should show similarly low support. Alternatively, introgression will  
288 lead to an imbalance of support towards the topology with the two taxa exchanging alleles as  
289 sister taxa (Pease and Hahn 2015; Blischak et al. 2018; Kubatko and Chifman 2019). HyDe also  
290 estimates  $\gamma$ , which is the parental contribution in a putatively hybrid genome, where a value of  
291 0.5 would indicate a 50:50 genomic contribution from each parent.

292 We also modeled hybridization and ILS under the coalescent network framework as  
293 implemented in PhyloNet 3.6.6 (Yu and Nakhleh 2015). Networks were computed under  
294 Maximum Pseudo-Likelihood (*InferNetwork\_MPL*) (Yu and Nakhleh 2015) using rooted  
295 autosomal gene trees. We modeled 0 to 5 migration events, associated individuals to species

296 (option -a), and optimized branch lengths and inheritance probabilities to compute likelihoods  
297 for each proposed network (option -o). We calculated Akaike information criteria corrected for  
298 small sample sizes (AICc) and Bayesian Information Criteria (BIC) using the highest likelihoods  
299 per run to compare the resulting networks (Yu et al. 2012; Yu et al. 2014). Networks were  
300 visualized with IcyTree (<https://icytree.org>; last accessed Dec 2020).

301

## 302 **RESULTS**

### 303 **DRAFT GENOME ASSEMBLY AND SEQUENCE CAPTURE**

304 We generated ~217 Gb of *T. minimus* genomic sequence data using 10X Genomics technology  
305 (Pleasanton, CA, USA) and assembled a 2.48 Gb draft genome with a contig N50 of 196.09 kb  
306 and as scaffold N50 of 58.28 Mb, respectively (Supplementary Table S2). We then analyzed up  
307 to 9.4 Mb of sequence capture data from 121 individuals, combining newly generated (112  
308 individuals from 15 species) and published data (nine individuals from seven species; Bi et al.  
309 2019; Sarver et al. 2021; Supplementary Table S1) for 21 western chipmunk species and the  
310 outgroup *T. striatus*. Sequencing efforts produced ~4 million reads per sample with an average of  
311 0.5% of targets showing no coverage. Approximately 75% of raw reads were unique, resulting in  
312 an average target coverage of 33× across samples (range: 5–91×) with ~73% of targeted bases  
313 sequenced to at least 10× coverage (Supplementary Table S3). Comparison of male versus  
314 female coverage resulted in the identification of three contigs (79.7 Mb, 35.6 Mb, 5.9 Mb) in the  
315 genome assembly that are likely on the X chromosome.

316

### 317 **THE *TAMIAS* PHYLOGENY**

318 We first estimated a genus-wide ML phylogeny from a concatenated set of 21,551 autosomal  
319 (5,365,556 bp) and 493 X-linked (105,671 bp) loci from the combined capture datasets, as well  
320 as an ML phylogeny based on the full mtDNA genome (Figure 2A; Supplemental Figure S1-S2).  
321 The concatenated autosomal ML analysis recovered a fully resolved phylogeny with high  
322 support for all branches (UFBoot > 90%) and is concordant with previous studies (Reid et al.  
323 2012; Sullivan et al. 2014; Sarver et al. 2021). *Tamias m. grisescens* appeared as a distinct  
324 lineage in these analyses and was not most closely related to other *T. minimus* samples.  
325 Likewise, *cratericus* was a distinct, monophyletic lineage that was most closely related to *T.*  
326 *ruficaudus* and not other *T. amoenus*. Within *cratericus*, we also recovered a deep split between  
327 the two sampled localities (hereafter *cratericus* lineages A and B; Figure 2A). ML reconstruction  
328 of the mitochondrial genome resulted in a different topology from the nuclear dataset  
329 (Supplemental Figure S2) and was largely concordant with previous studies based on the  
330 cytochrome *b* gene (Demboski and Sullivan 2003; Good et al. 2003; Good et al. 2008; Reid et al.  
331 2012; Good et al. 2015; Sarver et al. 2017) with *cratericus* most closely related to *T.*  
332 *quadrimaculatus*, and then to *T. minimus*. Our mitochondrial genome reconstruction also  
333 recovered an individual from the putative *cratericus* lineage B (CRCM06-160; Supplemental  
334 Figure S2) as having a *T. amoenus* mtDNA genome, consistent with introgression. The  
335 multispecies-coalescent species trees estimated from ASTRAL (158 genes trees estimated from  
336 50 kb genomic intervals) and SVDquartets (13,482 unlinked SNPs) was largely concordant with  
337 the results of the concatenated ML analyses. Strong support was recovered for the branching  
338 relationships among species groups within *Tamias* (ASTRAL posterior probabilities > 0.9 and  
339 SVDquartets bootstrap support > 90). All analyses recovered both *grisescens* and *cratericus* as  
340 distinct, monophyletic lineages. However, one notable difference across analyses was the



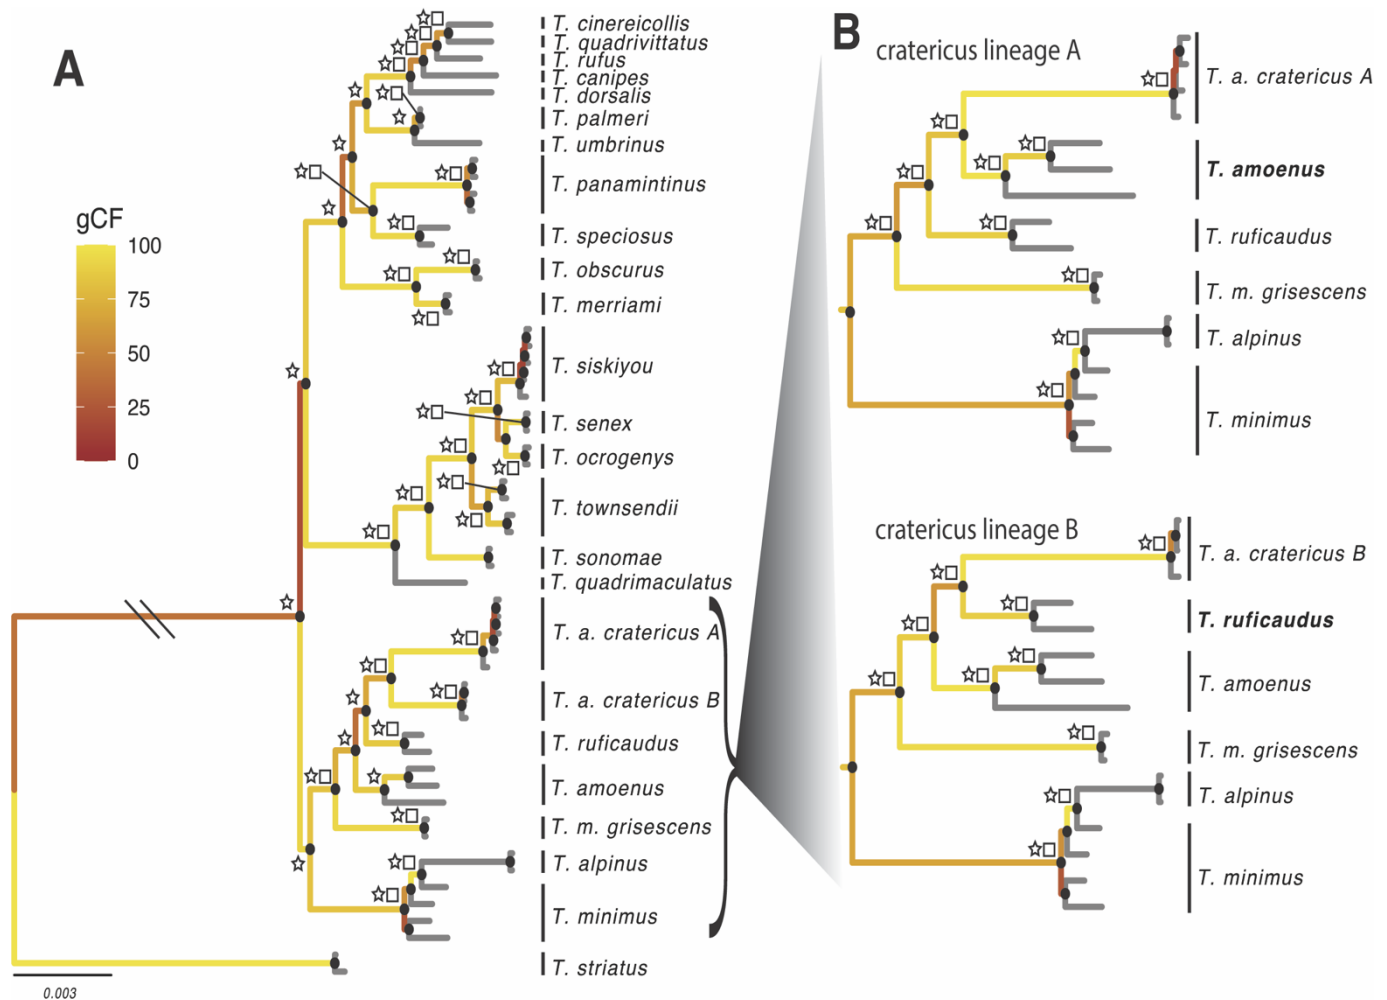

**Figure 2 – Genome-wide phylogeny of *Tamias*.** **A)** Concatenated ML tree estimated with IQ-Tree; Node labels represent: ASTRAL posterior probability equal to one (star), bootstrap greater than 90 (square), and bootstrap proportions greater than 90 (grey circles). Branches are colored according to gene concordance factor (gCF). **B)** ML reconstruction of the *amoenus-ruficaudus-cratericus* clade with the exclusion of *cratericus* lineage A and *cratericus* lineage B respectively.

341 relationship of *cratericus* with respect to *T. ruficaudus* and other *T. amoenus*. Both concatenated  
 342 ML analyses and ASTRAL recovered *cratericus* as the sister lineage to *T. ruficaudus*, whereas  
 343 SVDquartets recovered *cratericus* as more closely related to other *T. amoenus* but with weak  
 344 support (Supplemental Figures S3-S6). Overall, the splits between *T. amoenus-cratericus-T.*  
 345 *ruficaudus* were not well-supported and remained unresolved (Figure 2A; Supplemental Figure  
 346 S1-S6).

347           Given the deep split within the *cratericus* clade and low support for the branching  
348 structure, we hypothesized that there might be unequal ancestry between the two *cratericus*  
349 lineages, *T. amoenus*, and *T. ruficaudus*. To explore this we re-analyzed these data while  
350 excluding either *cratericus* lineage A or lineage B. When *cratericus* lineage B was excluded, we  
351 consistently recovered *cratericus* as the sister lineage to *T. amoenus* with strong support. In  
352 contrast, analyses excluding *cratericus* lineage A recovered *cratericus* as sister to *T. ruficaudus*  
353 with strong support (Figure 2B).

354

### 355 **POPULATION GENOMICS OF *CRATERICUS***

356 To elucidate the evolutionary history and geographic extent of the cryptic *cratericus* lineages, we  
357 sequenced an additional 64 chipmunks from an additional 12 localities (seven *cratericus*/*T.*  
358 *amoenus* localities; five *T. minimus* localities; Figure 3) ranging from relatively low desert sage  
359 scrub to higher elevation temperate coniferous forests throughout south central Idaho. Initial  
360 qualitative assessment of gross bacular morphologies from these samples suggested that  
361 *cratericus* may be more widespread in central Idaho, ranging north from the temperate  
362 coniferous forest/sage scrub transitional zone of the Snake River Plain to the temperate/subalpine  
363 zones of the Salmon River. Following the procedures above, we generated an alignment of  
364 7,813,766 bp for autosomal loci and 175,884 bp for X-linked loci with >80% of individuals  
365 genotyped at a minimum coverage of 5×.

366           The ML tree from the concatenated set of autosomal and X-linked loci were largely  
367 congruent with the genus-wide analysis. *T. minimus* (minus *griseescens*) was monophyletic, with  
368 *T. m. griseescens* as a distinct lineage that was more closely related to the *T. amoenus-cratericus-*  
369 *T. ruficaudus* complex than to other *T. minimus*. Our expanded sampling substantially increased

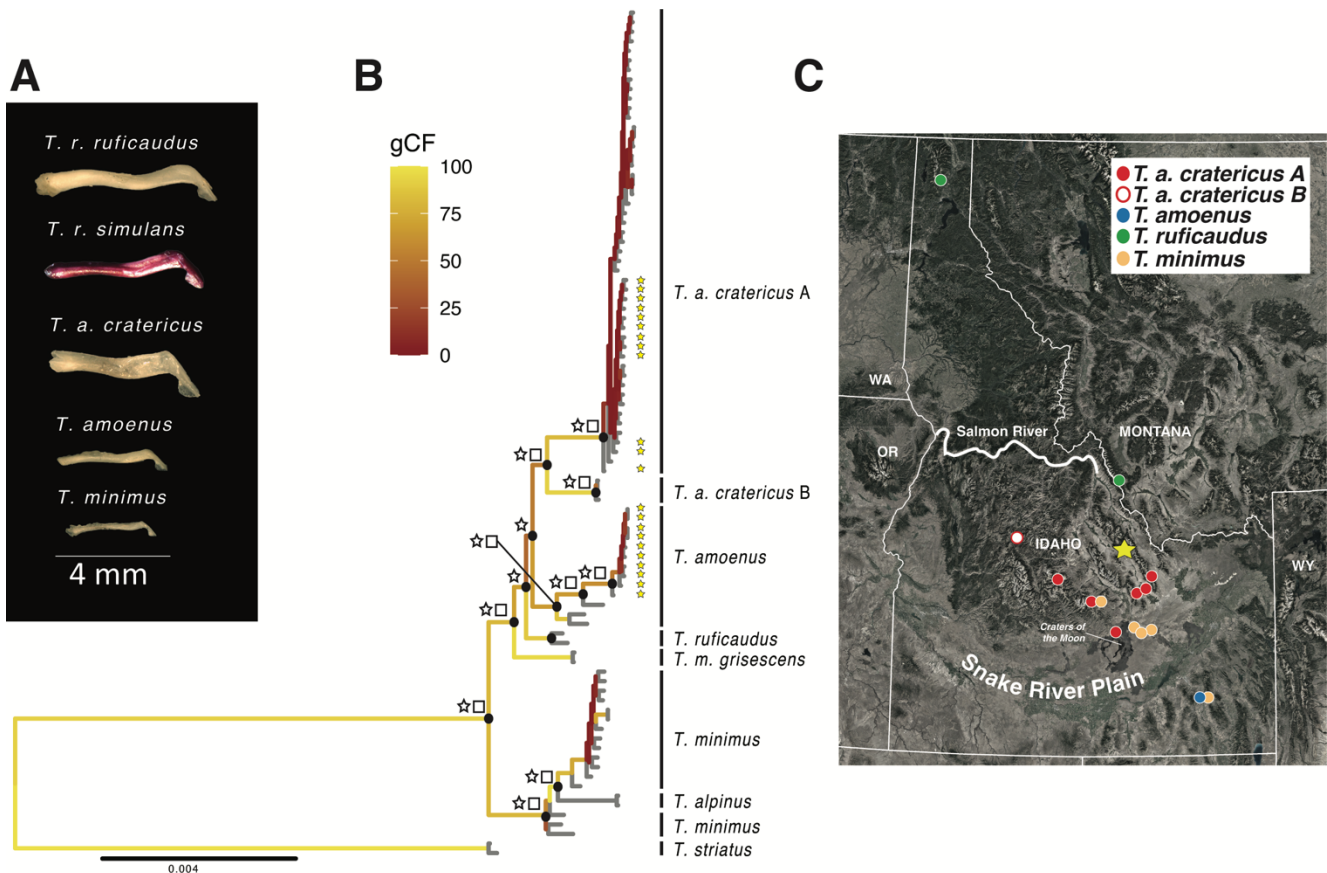

**Figure 3 – ML concatenated phylogeny for *cratericus-amoenus-ruficaudus*.** **A)** Representative bacular morphologies for the five taxa. **B)** Concatenated ML tree estimated with IQ-Tree for the full population level sampling of *cratericus*; Node labels represent: ASTRAL posterior probability equal to one (star), SVDquartets bootstrap greater than 90 (square), and bootstrap proportions greater than 90 (black circles). Branches are colored according to gene concordance factor (gCF). Yellow stars at the tips indicate *cratericus* and *T. amoenus* samples from the sympatric Iron Creek locality (yellow star on map). **C)** Sampling localities for population sampling. Note that our sampling also includes non-Idaho populations for *T. minimus*, *T. amoenus*, and *grisescens* that are not shown.

370 the diversity detected within *cratericus* lineage A, which was found at 6 additional localities to  
 371 the near exclusion of *T. amoenus*. We again recovered a deep split within *cratericus*, with  
 372 lineage B still represented by only a single locality (Figure 3; Supplemental Figure S7).

373 However, the most notable difference between this expanded subset and our genus-wide  
 374 analysis was that *cratericus* now appeared sister to other *T. amoenus* (Figure 3B; Supplemental  
 375 Figures S10-13). One potential source of phylogenetic discordance between the datasets may be  
 376 driven by samples from one locality, known as Iron Creek (IC; yellow star; Figure 3C). At this

377 locality, both *cratericus* and standard *T. amoenus* bacular types were found to co-occur without  
378 other obvious phenotypic or habitat differences. This was the only site where both forms were  
379 found to be sympatric. Collectively, these results suggest that *cratericus* is distributed across the  
380 coniferous forest of south central Idaho, north of the Snake River Plain to the near exclusion of  
381 *T. amoenus*, save for one sympatric locality. At this site, we observed the maintenance of  
382 genetically defined species boundaries despite some evidence for admixture between *cratericus*  
383 and *T. amoenus* (see below).

384         Next, we evaluated if the change in the relationship between *T. ruficaudus*-*cratericus*-*T.*  
385 *amoenus* was influenced by possible gene flow at the sympatric IC locality. Consistent with this,  
386 *cratericus* was again sister to *T. ruficaudus* in a concatenated analysis when excluding all IC  
387 samples. However, the species trees estimated from ASTRAL (158 genes trees estimated from  
388 50 kb genomic intervals) and SVDquartets (17,594 unlinked SNPs) for the expanded subset  
389 resulted in *cratericus* being sister to *T. amoenus*, regardless of whether IC individuals were  
390 included (Supplemental Figures S10-13). Branch support increased when IC samples were  
391 excluded but we still found a large degree of incongruence based on gCF and sCF. Finally, the  
392 results of our BPP analyses were largely consistent across the 5 replicate runs using different  
393 starting species trees, with 4 of the 5 runs converging on the same maximum *a posteriori*  
394 probability (MAP) tree, with a posterior probability of ~100%. BPP recovered *cratericus* as  
395 being sister to *T. ruficaudus* (Supplemental Figure S9).

396         ML reconstruction of mitochondrial genomes from the expanded subset also showed  
397 evidence for mtDNA introgression between *cratericus* and *T. amoenus* (Supplemental Figure  
398 S8). As with the genus-wide analysis, *cratericus* and *T. amoenus* were paraphyletic, but the  
399 paraphyly in the mtDNA tree was not solely driven by discordance within the IC locality. One

400 *cratericus* mtDNA clade was composed of individuals from the majority of *cratericus* lineages A  
401 and B but excluding IC, and was sister to a monophyletic *T. minimus* clade. The second major  
402 group was composed of *T. amoenus*, including IC *T. amoenus* and *cratericus* from IC as well as  
403 a single individual from lineage B (CRCM06-160 as in the genus-wide analysis; Supplemental  
404 Figure S8).

405 Principal components of genetic variance (PCA) further supported a history of  
406 hybridization and mixed ancestry between *T. amoenus*-*cratericus*-*T. ruficaudus*. PC1 largely  
407 partitioned the most divergent lineage, *T. minimus*, from a cluster consisting of *cratericus*-*T.*  
408 *amoenus*-*T. ruficaudus*. PC2 split *T. amoenus* and *cratericus*, with *T. ruficaudus* falling  
409 intermediate. Cross-validation with ADMIXTURE suggested five population clusters that were  
410 largely concordant with the PCA (Figure 4B; Supplemental Figures S14-15), although we note  
411 that this analysis is not well-suited to partition genetic clusters at this scale of interspecific  
412 divergence (Lawson et al. 2018). Interestingly, both methods showed a tendency to cluster  
413 *cratericus* lineage B with *T. ruficaudus* and suggested a closer relationship between *cratericus*  
414 and *T. ruficaudus* than to *T. amoenus*. However, we also detected a moderate proportion of  
415 shared ancestry between sympatric (IC) *cratericus* and *T. amoenus*, likely driven by gene flow in  
416 sympatry.

417

## 418 **PATTERNS OF INTROGRESSION AND NETWORK ANALYSES**

419 We tested for further evidence of introgression using multiple analyses based on the multispecies  
420 network coalescent (PhyloNet), quartet-based analyses under the invariants framework (HyDe)  
421 and estimates of admixture proportions based on the D-statistic (Green et al. 2010; Durand et al.  
422 2011; Yu and Nakhleh 2015; Blischak et al. 2018). Collectively, these analyses supported

423 varying levels of recurrent gene flow between both *cratericus*-*T. ruficaudus*, and *cratericus* -*T.*  
424 *amoenus*. PhyloNet supported a model of more ancient introgression, which has likely affected  
425 the inferred split between *T. amoenus*-*cratericus*-*T. ruficaudus*. The best supported network  
426 analysis (5 reticulations) suggested that *T. ruficaudus* and *cratericus* were sister lineages, with  
427 reticulation between ancestral populations of *T. amoenus* and the *cratericus* lineage. Other less  
428 well-supported reconstructions placed *T. amoenus* as more closely related to *cratericus* with a  
429 complex pattern of recurrent gene flow between *cratericus* lineage A and B with both *T.*  
430 *ruficaudus* and *T. amoenus* (Supplemental Figure S16). Quartet-based analyses of introgression  
431 resulted in three significant triplet comparisons supporting hybridization (Supplemental Table  
432 S4). First, *cratericus* lineage A showed shared ancestry between *T. amoenus* and *cratericus*  
433 lineage B, consistent with a close relationship between *cratericus* lineages A and B and recent  
434 hybridization between both lineages and *T. amoenus*. We also detected a pattern of shared  
435 ancestry between both *cratericus* lineages (A and B) with *T. ruficaudus* and *T. amoenus*.  
436 However, the proportion of shared ancestry was asymmetrical with respect to the amount of  
437 introgression inferred from *T. amoenus* into either *cratericus* lineage (*T. amoenus*-*cratericus*  
438 lineage A  $\gamma = 0.344$ ; *T. amoenus*-*cratericus* lineage B  $\gamma = 0.541$ ). Under the ABBA-BABA  
439 framework, we evaluated phylogenetic patterns of shared SNVs between both *T. amoenus*-  
440 *cratericus* and *T. ruficaudus*-*cratericus*. We found that most sites supported a pattern of  
441 differential introgression between *cratericus* lineage A and both *T. amoenus* and to a lesser



442 extent *T. ruficaudus* relative to *cratericus* lineage B (Supplemental Figure S17; Supplemental  
443 Table S4-S5).

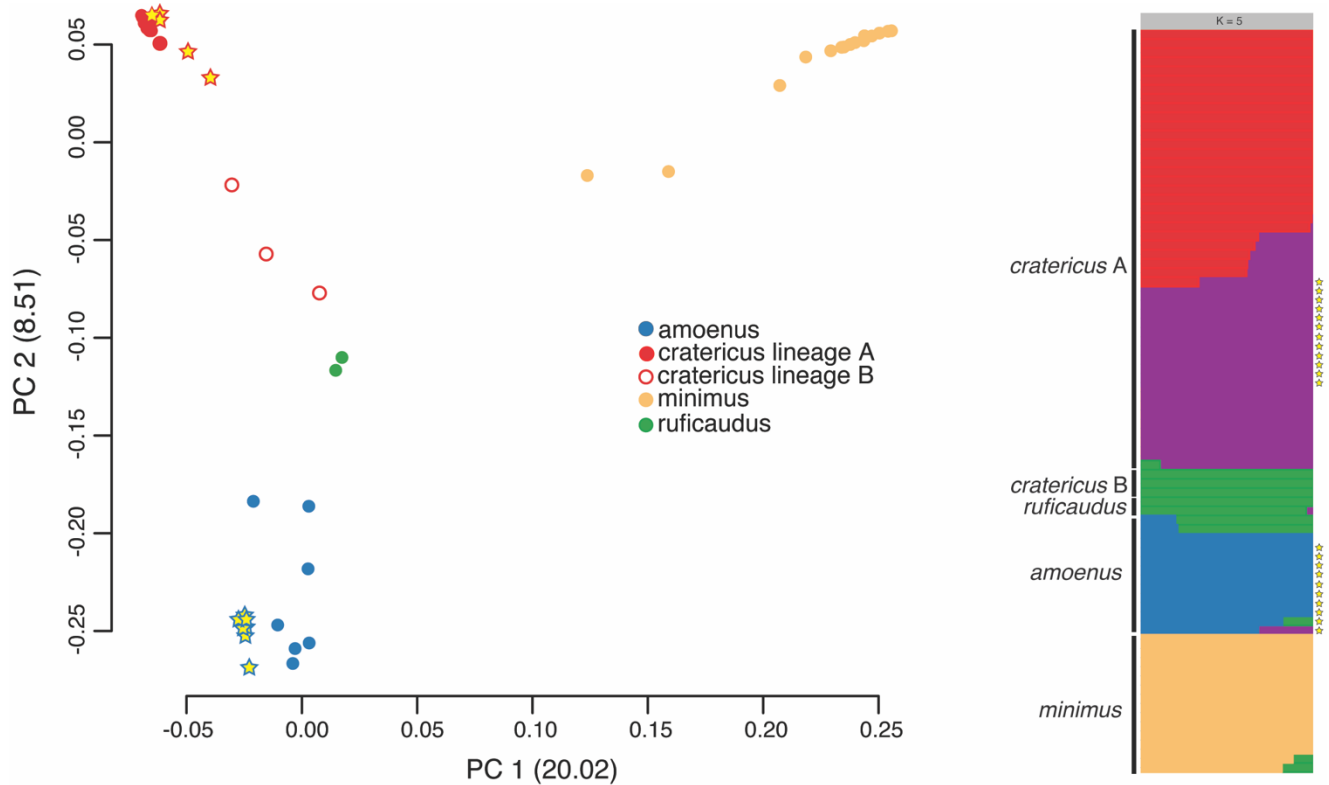

**Figure 4 –Population structure between *cratericus*-*amoenus*-*ruficaudus* sampled. A)** PCA results from SNPRelate. **B)** Admixture output for highest marginal-likelihood run at k=5. Stars indicate samples from the sympatric locality Iron Creek.

## 444 DISCUSSION

445 Discovery of cryptic species is fundamental to understanding the process of speciation and  
446 cataloging global diversity, which is facing unprecedented pressures due to the emerging threats  
447 of climate change and habitat loss. We generated a *de novo* assembled reference genome for a  
448 western chipmunk species, *Tamias minimus*, and used new and published genome-wide targeted  
449 capture sequencing data and whole mitochondrial genomes to test for cryptic speciation and  
450 hybridization in western chipmunks. Our genus-wide analysis represents the most  
451 comprehensive phylogenetic assessment of the western chipmunks to date and, we suggest,  
452 reveals at least two new undescribed chipmunk species. Below we discuss the evolutionary

453 implications of our findings, focusing on western chipmunk diversity and the complex speciation  
454 dynamics of the Crater chipmunk and other co-distributed species.

455

## 456 **SYSTEMATICS OF THE WESTERN CHIPMUNK RADIATION**

457 Due to their abundance and conspicuous nature, chipmunks have been the focus of a broad range  
458 of biological studies including physiology (e.g., Levesque and Tattersall 2009), niche  
459 partitioning and competitive exclusion (e.g., Grinnell and Storer 1924; Heller 1971), behavior  
460 (e.g. Broadbrooks 1970), and responses to climate change (e.g., Moritz et al. 2008; Bi et al.  
461 2019). Early phylogenetic studies using morphology and allozymes (Levenson et al. 1985),  
462 host/ectoparasite (Jameson 1999), chromosomal (Nadler and Block 1962) and molecular data  
463 (Piaggio and Spicer 2000; Piaggio and Spicer 2001) recognized three distinct clades within  
464 *Tamias*: *T. sibiricus*, *T. striatus*, and the western North America species (arbitrarily classified as  
465 either subgenera or genera; (e.g., Jameson 1999; Patterson and Norris 2016). Relationships  
466 among the 23 currently recognized species within the western chipmunk clade (subgenus  
467 *Neotamias*) have remained somewhat obscure due to a lack of resolution among internal nodes  
468 and apparently rampant mitochondrial introgression (Piaggio and Spicer 2000; Reid et al. 2012;  
469 Sullivan et al. 2014). Our analysis of western chipmunks represents the most comprehensive  
470 genome-wide assessment of the group to date and included 22 of the 25 recognized species of  
471 *Tamias*.

472 We recovered strongly supported, monophyletic species groups within the western  
473 chipmunks that were in general agreement with some other studies (e.g., Reid et al. 2012).  
474 However, one notable difference was the relationship between *T. ruficaudus*-*T. amoenus*-*T.*  
475 *minimus*. In contrast to Reid et al. (2012), we recovered *T. ruficaudus* as being sister to either



476 *cratericus*, or to a clade composed of *T. amoenus-cratericus* (see discussion below) whereas  
477 Reid et al. (2012) found *T. ruficaudus* sister to the enigmatic, and similarly distinct lineage  
478 *griseus*. In addition, Reid et al. (2012) also recovered *T. amoenus* as sister to *T. minimus*,  
479 whereas we found *T. minimus* as the sister lineage to the main *T. amoenus-T. ruficaudus-*  
480 *cratericus-griseus* clade. Given a lack of resolution among internal nodes in previous studies,  
481 this difference likely reflects the power afforded by much more extensive genetic sampling.

482 A major conclusion of our genomic study was the resolution of two cryptic lineages of  
483 chipmunk. While some of the relationships among described species have been unclear until  
484 recently, the identity of species as the fundamental units of diversity have remained fairly stable  
485 over the last century. The vast majority of chipmunk species were described to some degree by  
486 the late 19th and early 20th Centuries by the early naturalists Allen, Merriam, and others based  
487 on phenotypic and ecological characteristics (for a review see Thorington Jr. et al. 2012).  
488 Subsequent discussions have focused on determining if subspecific variation within some species  
489 warrant species-level recognition (Patterson 1984; Patterson and Heaney 1987; Good et al. 2003)  
490 or if some current species are actually geographically isolated populations of more widespread  
491 forms (Piaggio and Spicer 2000; Piaggio and Spicer 2001; Rubidge et al. 2014). The putative  
492 *griseus* lineage reflects these dynamics. Howell (1925) described the distinctive *T. m.*  
493 *griseus* based on its pelage as a least chipmunk subspecies restricted to the Channeled  
494 Scablands of central Washington. Reid et al. (2012) then identified this taxon as a potentially  
495 cryptic lineage and found it consistently nested with *T. amoenus* based on limited nuclear and  
496 mtDNA data. Although a formal description awaits additional geographic sampling, our data  
497 clearly show that *griseus* does not fall within the considerable genetic diversity of the least  
498 chipmunk (*T. minimus*) or other sampled species, and we propose that *griseus* is in fact a

499 novel, cryptic chipmunk species (i.e., *Tamias griseescens* following Howell 1925). Of note,  
500 *griseescens* is much more genetically distinct from other chipmunk species than the Alpine  
501 chipmunk (*T. alpinus*); a lineage that is paraphyletic with respect to *T. minimus* but has long been  
502 recognized as a distinct species based on phenotypic divergence, ecological differentiation, and  
503 reproductive isolation (Grinnell & Storer; Heller; Rubidge 2014; Bi et al. 2019). We also found  
504 *griseescens* nested within *T. amoenus* in our mtDNA analyses, suggesting a history of mtDNA  
505 introgression or incomplete lineage sorting (Supplemental Figure S3). While our study lacks the  
506 sampling needed to fully investigate the evolutionary history of *griseescens* (two individuals from  
507 the same locality), its range in central Washington could contribute to vulnerability due to habitat  
508 loss, wildfire, and drought due to rapid climate change.

509 We also show that *cratericus* is likely a distinct chipmunk species that appears to be most  
510 closely related to *T. ruficaudus*. Blossom (1937) first described *cratericus* as a duller, dark  
511 variant of the yellow-pine chipmunk that is associated with the recent volcanic lava flows of  
512 Craters of the Moon. The color morphology of *cratericus* rapidly transitions to a more brightly  
513 colored pelage morph more like standard *T. amoenus* phenotypes and, we show, is found  
514 throughout the adjacent xeric forest habitats of the region. This localized pelage presumably  
515 reflects recent adaptation for crypsis on the black lava flows, a pattern that is also observed in  
516 local populations of the Great Basin pocket mouse (*Perognathus parvus*) and pika (*Ochotona*  
517 *princeps*) from Craters of the Moon (Blossom, 1937). More surprisingly, *cratericus* appears to be  
518 the locally dominant form throughout central Idaho (see below).

519 Overall, we also found that most western chipmunk groups displayed a high degree of  
520 discordance between the mtDNA phylogeny and the nuclear genome, consistent with previous  
521 studies documenting recurrent mtDNA introgression layered across the history of this group

522 (e.g., Demboski & Sullivan, 2003; Sullivan et al. 2014; Sarver et al. 2017). Interestingly,  
523 previous works have suggested distinct species boundaries with comparably low levels of  
524 nuclear introgression relative to more rampant mtDNA introgression (Good et al. 2015; Sarver et  
525 al. 2021; however, see Ji et al. 2021). From this perspective, the complex evolutionary history  
526 and extensive nuclear gene flow observed between *cratericus* and both *T. amoenus* and *T.*  
527 *ruficaudus* is noteworthy relative to other chipmunk studies to date.

528

### 529 **THE COMPLEX EVOLUTIONARY HISTORY OF *TAMIAS CRATERICUS***

530 Our data and analyses provide compelling evidence to support *cratericus* as at least one distinct  
531 species. However, the full evolutionary history of this taxon appears to be obscured by a history  
532 of rapid speciation and likely recurrent instances of hybridization with populations of *T. amoenus*  
533 and, possibly, *T. ruficaudus*. To reconstruct this complex evolutionary history, we considered  
534 how incomplete lineage sorting and gene flow structured through space and time may lead to  
535 contrasting patterns of shared genetic variation among populations. When we assessed the  
536 placement of *cratericus* in a genus-wide context, our results suggest *cratericus* is most closely  
537 related to *T. ruficaudus* albeit with low support (Figure 2). Interestingly, SVDquartets converged  
538 on a different topology than both ASTRAL and BPP. ASTRAL and BPP agreed with the  
539 concatenated analysis and found *cratericus* sister to *T. ruficaudus*, whereas SVDquartets  
540 consistently grouped *cratericus* with *T. amoenus*. Both ASTRAL and SVDquartets appeared  
541 sensitive to sampling and the branches in question received moderate to weak support across all  
542 analyses (Figure 2; Supplemental Figures S3-S6). In contrast, while we found strong support  
543 with BPP, these analyses were limited to a relatively small subset of data which could produce  
544 misleading results given the potential for differential introgression.

545           Low branch support could be due to either a lack of information across all loci used to  
546 resolve relationships (e.g., due to very short internal branches and/or homoplasy) or because  
547 gene trees have independent phylogenetic histories that differ from the species tree due to  
548 incomplete lineage sorting and/or hybridization. These two sources of discordance likely  
549 compromise our ability to resolve this portion of the *Tamias* phylogeny; both gene concordance  
550 factors (gCF) and site concordance factors (sCF) for the *cratericus*-*T. ruficaudus* split were  
551 comparably low (gCF: 37.3; sCF: 38.6; Fig 2, Supplemental Figure S1).

552           One major criticism of coalescent-based summary methods, such as ASTRAL, is that  
553 they may incorrectly infer a species tree because they are sensitive to stochastic variation in  
554 phylogenetic signal between loci (Mirarab et al. 2016; Morales-Briones et al. 2018). However,  
555 the discordance observed between our approaches likely reflect biological causes of discordance  
556 such as ILS and introgression. For example, gene tree estimation error often results in a skewed  
557 ratio of gCF:sCF values (Minh et al. 2020a), a pattern we do not see, even across the weakest  
558 supported branches.

559           While individual tree-based approaches may be limited when local genealogies are  
560 poorly resolved due to rapid divergence or limited data, our data also strongly supported the  
561 conclusion that much of the phylogenetic discordance likely reflects introgressive hybridization.  
562 We consistently detected genealogical asymmetry between *cratericus* lineage A and *cratericus*  
563 lineage B with respect to both *T. ruficaudus* and *T. amoenus*. When we assessed the relationship  
564 of either *cratericus* lineage in the absence of the other, we found strong support for two different  
565 topologies. When we excluded *cratericus* lineage B, *cratericus* lineage A was consistently sister  
566 to *T. amoenus*. Conversely, when we excluded *cratericus* lineage A, we recovered *cratericus*  
567 lineage B as the sister group to *T. ruficaudus* (Figure 2; Supplemental Figures S8-S9). Further,

568 we inferred multiple reticulations across the *amoenus-cratericus-ruficaudus* splits, suggesting  
569 there has been both recent and ancient hybridization between these lineages during their  
570 diversification. Both contemporary and past hybridization events have resulted in extensive  
571 shared polymorphism among the three lineages (Supplemental Figures. S16-S17) and highlight  
572 how rapid diversification and introgressive hybridization can confound our ability to infer a  
573 complex evolutionary history among species.

574 Integrating our phylogenetic and population genomic data, we propose a working model  
575 for the evolutionary history of *cratericus* (Figure 5). There was an initial (likely geographic) split  
576 between *cratericus* and other *T. ruficaudus*, followed by intermittent hybridization between  
577 ancestral populations of *cratericus*, *T. ruficaudus*, and the slightly more distantly related *T.*  
578 *amoenus*. Determining if the apparent genetic split within *cratericus* is associated with  
579 reproductive isolation between these lineages or divergence in other morphological or ecological  
580 traits awaits further sampling. While lineage A appears to be the widespread and predominant  
581 form, the rarity of lineage B may be due to a lack of sampling in the presumed northern range of  
582 *cratericus*. We also detected gene flow between *T. amoenus* and the more widely distributed  
583 *cratericus* lineage A (Figures 3-4). While a history of recurrent hybridization likely skews  
584 overall phylogenetic relationships, the sympatric population (IC) allows us to test key predictions  
585 about the extent of reproductive isolation between these ecologically and phenotypically similar  
586 species. In this area of sympatry, individuals clearly clustered within *cratericus* lineage A or with  
587 other *T. amoenus*. Thus, species boundaries appear to be largely maintained, despite some level  
588 of gene flow between *cratericus* and *T. amoenus* (Figures 3-4; Supplemental Figure S14),  
589 consistent with a semipermeable species boundary (Harrison and Larson 2014). Our results also  
590 indicate that *cratericus* is the predominant chipmunk species associated with xeric forests of

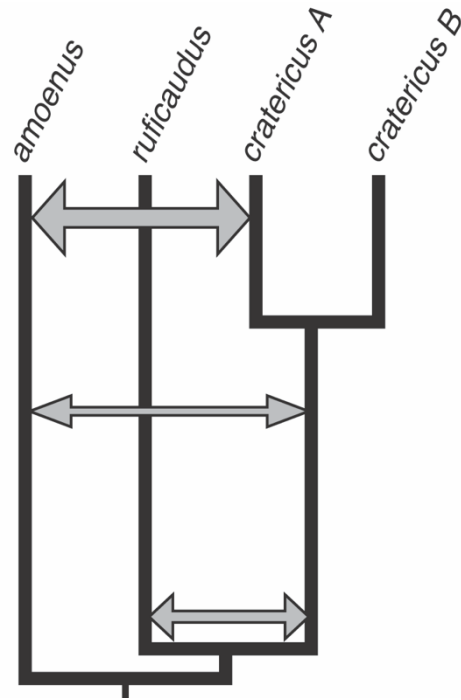

**Figure 5 – Proposed species tree and evolutionary history of *T. cratericus*.** *T. cratericus* has a complex evolutionary history punctuated by layered ancient and contemporary gene flow between co-distributed species. Arrow thickness indicates inferred amount of introgression.

591 south-central Idaho north of the Snake River Plain and south of the Snake River. This previously  
592 unknown lineage appears to exist largely to the exclusion *T. amoenus*. Since the foundational  
593 work of Grinnell a century ago (Grinnell and Storer 1924), western chipmunks have been  
594 considered exemplars of ecological niche partitioning. Given the lack of obvious ecological and  
595 phenotypic differentiation between *cratericus* and *T. amoenus*, sympatric populations between  
596 these species may provide a compelling eco-evolutionary context to understand both the local  
597 maintenance of species boundaries and niche partitioning through competitive exclusion or other  
598 mechanisms.

599 Finally, our current sampling is not circumscribed by clear geographic barriers to the  
600 north and west, indicating the full range of *cratericus* may be considerably larger and likely  
601 extends into the remote wilderness tracks of central Idaho. Although these portions of the range

602 are more difficult to access, this diurnal cryptic species is also highly abundant and readily  
603 visible around the visitor center of a National Monument that hosts ~200,000 annual visitors –  
604 underscoring that cryptic biodiversity may persist even in highly conspicuous systems.

605

606 **Conflict of Interest:** The authors declare no conflict of interest.

607

608 **Data Archive:** Read sequence data are available for download at SRA under the BioProject  
609 accession number XXXX.

610

611 **Author contributions:** NDH, JRD, JS, KCB, and JMG conceived and designed the study. JMG,  
612 JRD, and JS acquired funding. NDH, KCB, JRD, and JMG conducted fieldwork. CMC, EN, and  
613 NDH generated sequence data. NDH conducted data analyses, with guidance from BAJIS and  
614 JMG. BAJIS contributed analytical tools. All authors discussed the results. NDH and JMG wrote  
615 the manuscript with feedback from all authors.

616

617 **Acknowledgements:** Our research would not be possible without the irreplaceable support of  
618 natural history museums. We are grateful to the collections staff of The Denver Museum of  
619 Nature & Science and Joseph A. Cook and the University of New Mexico Museum of Southwest  
620 Biology for providing tissue loans. We also thank Michael Fazekas, Roger Rodriguez, Patricia  
621 McDonald, Randle McCain, Bryan McLean, Schuyler Liphardt, and Lois Alexander for help  
622 with fieldwork. We thank David Xing, Jessi Kopperdahl, Mickael Fazekas, and Sara Keeble for  
623 assisting with molecular work. We thank members of the Good lab, the University of Montana  
624 UNVEIL network, Ke Bi, and Craig Moritz for helpful discussions. Funding support for this

625 research was provided by a grant from the National Science Foundation (NSF) EPSCoR (OIA-  
626 1736249 to JMG), NSF (DEB-0716200 to JRD), a travel grant from the Drollinger-Dial  
627 Foundation, the Gordon and Betty Moore Foundation (GBMF2983), the Rose Community  
628 Foundation, and research funds from the University of Montana and Denver Museum of Nature  
629 & Science. This study included research conducted in the University of Montana Genomics  
630 Core, supported by a grant from the M. J. Murdock Charitable Trust (to JMG). Computational  
631 resources and support from the University of Montana's Griz Shared Computing Cluster  
632 (GSCC), supported by grants from the Nation Science Foundation (CC-2018112 and OAC-  
633 1925267), contributed to this research. The DNA isolation, library preparation, and sequencing  
634 of the draft *Tamias minimus* genome was carried out at the DNA Technologies and Expression  
635 Analysis Core at the UC Davis Genome Center, supported by NIH Shared Instrument Grant  
636 1S10OD010786-01.



## 637 LITERATURE CITED

- 638 Alexander, D. H., J. Novembre, and K. Lange. 2009. Fast model-based estimation of ancestry in  
639 unrelated individuals. *Genome Resources* 19:1655-1664.
- 640 Bi, K., T. Linderoth, S. Singhal, D. Vanderpool, J. L. Patton, R. Nielsen, C. Moritz, and J. M.  
641 Good. 2019. Temporal genomic contrasts reveal rapid evolutionary responses in an alpine  
642 mammal during recent climate change. *PLoS Genetics* 15:e1008119.
- 643 Bi, K., D. Vanderpool, S. Singhal, T. Linderoth, C. Moritz, and J. M. Good. 2012.  
644 Transcriptome-based exon capture enables highly cost-effective comparative genomic  
645 data collection at moderate evolutionary scales. *BMC Genomics* 13:1-14.
- 646 Bickford, D., D. J. Lohman, N. S. Sodhi, P. K. Ng, R. Meier, K. Winker, K. K. Ingram, and I.  
647 Das. 2007. Cryptic species as a window on diversity and conservation. *Trends Ecol Evol*  
648 22:148-155.
- 649 Blischak, P. D., J. Chifman, A. D. Wolfe, and L. S. Kubatko. 2018. HyDe: A Python Package for  
650 Genome-Scale Hybridization Detection. *Syst Biol* 67:821-829.
- 651 Blossom, P. M. 1937. Description of a race of chipmunk from south central Idaho. *Occasional*  
652 *Papers of the Museum of Zoology*:1-3.
- 653 Borowiec, M. L. 2016. AMAS: a fast tool for alignment manipulation and computing of  
654 summary statistics. *PeerJ* 4:e1660.
- 655 Broadbrooks, H. E. 1970. Home Ranges and Territorial Behavior of the Yellow-Pine Chipmun  
656 k (*Eutamias amoenus*). *Journal of Mammalogy* 51:310-356.
- 657 Brown, J. H. 1971. Mechanisms of Competitive Exclusion Between Two Species of Chipmunk.  
658 *Ecology* 52:305-311.
- 659 Burgin, C. J., J. P. Colella, P. L. Kahn, and N. S. Upham. 2018. How many species of mammals  
660 are there? *Journal of Mammalogy* 99:1-14.
- 661 Callahan, J. R. 1977. Diagnosis of *Eutamias obscurus* (Rodentia: Sciuridae). *Journal of*  
662 *Mammalogy* 58:188-201.
- 663 Chang, C. C., C. C. Chow, L. C. Tellier, S. Vattikuti, S. M. Purcell, and J. J. Lee. 2015. Second-  
664 generation PLINK: rising to the challenge of larger and richer datasets. *Gigascience* 4:7.
- 665 Chifman, J. and L. Kubatko. 2014. Quartet inference from SNP data under the coalescent model.  
666 *Bioinformatics* 30:3317-3324.
- 667 Chifman, J. and L. Kubatko. 2015. Identifiability of the unrooted species tree topology under the  
668 coalescent model with time-reversible substitution processes, site-specific rate variation,  
669 and invariable sites. *J Theor Biol* 374:35-47.
- 670 Chou, J., A. Gupta, S. Yaduvanshi, R. Davidson, M. Nute, S. Mirarab, and T. Warnow. 2015. A  
671 comparative study of SVDquartets and other coalescent-based species tree estimation  
672 methods. *BMC Genomics*:1-11.
- 673 de Queiroz, K. 2007. Species concepts and species delimitation. *Syst Biol* 56:879-886.
- 674 Delic, T., P. Trontelj, M. Rendos, and C. Fiser. 2017. The importance of naming cryptic species  
675 and the conservation of endemic subterranean amphipods. *Sci Rep* 7:3391.
- 676 Demboski, J. R., and J. Sullivan. 2003. Extensive mtDNA variation within the yellow-pine  
677 chipmunk, *Tamias amoenus* (Rodentia: Sciuridae), and phylogeographic inferences for  
678 northwest North America. *Molecular Phylogenetics and Evolution* 26:389-408.
- 679 DePristo, M. A., E. Banks, R. Poplin, K. V. Garimella, J. R. Maguire, C. Hartl, A. A.  
680 Philippakis, G. del Angel, M. A. Rivas, M. Hanna, A. McKenna, T. J. Fennell, A. M.  
681 Kernysky, A. Y. Sivachenko, K. Cibulskis, S. B. Gabriel, D. Altshuler, and M. J. Daly.

- 682           2011. A framework for variation discovery and genotyping using next-generation DNA  
683           sequencing data. *Nat Genet* 43:491-498.
- 684 Durand, E. Y., N. Patterson, D. Reich, and M. Slatkin. 2011. Testing for ancient admixture  
685           between closely related populations. *Mol Biol Evol* 28:2239-2252.
- 686 Eberhard, W. G. 1985. *Sexual Selection and Animal Genitalia*. Harvard University Press,  
687           Cambridge, MA and London, England.
- 688 Edwards, D. L., and L. L. Knowles. 2014. Species detection and individual assignment in species  
689           delimitation: can integrative data increase efficacy? *Proc Biol Sci* 281:20132765.
- 690 Fišer, C., C. T. Robinson, and F. Malard. 2018. Cryptic species as a window into the paradigm  
691           shift of the species concept. *Mol Ecol* 27:613-635.
- 692 Flouris, T., X. Jiao, B. Rannala, and Z. Yang. 2018. Species Tree Inference with BPP Using  
693           Genomic Sequences and the Multispecies Coalescent. *Mol Biol Evol* 35:2585-2593.
- 694 Fujita, M. K., A. D. Leache, F. T. Burbrink, J. A. McGuire, and C. Moritz. 2012. Coalescent-  
695           based species delimitation in an integrative taxonomy. *Trends Ecol Evol* 27:480-488.
- 696 Good, J. M., J. R. Demboski, D. W. Nagorsen, and J. Sullivan. 2003. Phylogeography and  
697           Introgressive Hybridization: Chipmunks (Genus *Tamias*) in the Northern Rocky  
698           Mountains. *Evolution* 57:1900-1916.
- 699 Good, J. M., S. Hird, N. Reid, J. R. Demboski, S. J. Stepan, T. R. Martin-Nims, and J. Sullivan.  
700           2008. Ancient hybridization and mitochondrial capture between two species of  
701           chipmunks. *Mol Ecol* 17:1313-1327.
- 702 Good, J. M., D. Vanderpool, S. Keeble, and K. Bi. 2015. Negligible nuclear introgression despite  
703           complete mitochondrial capture between two species of chipmunks. *Evolution* 69:1961-  
704           1972.
- 705 Green, R. E., J. Krause, A. W. Briggs, T. Maricic, U. Stenzel, M. Kircher, N. Patterson, H. Li,  
706           W. Zhai, M. H. Fritz, N. F. Hansen, E. Y. Durand, A. S. Malaspina, J. D. Jensen, T.  
707           Marques-Bonet, C. Alkan, K. Prufer, M. Meyer, H. A. Burbano, J. M. Good, R. Schultz,  
708           A. Aximu-Petri, A. Butthof, B. Hober, B. Hoffner, M. Siegemund, A. Weihmann, C.  
709           Nusbaum, E. S. Lander, C. Russ, N. Novod, J. Affourtit, M. Egholm, C. Verna, P. Rudan,  
710           D. Brajkovic, Z. Kucan, I. Gusic, V. B. Doronichev, L. V. Golovanova, C. Lalueza-Fox,  
711           M. de la Rasilla, J. Forcia, A. Rosas, R. W. Schmitz, P. L. F. Johnson, E. E. Eichler, D.  
712           Falush, E. Birney, J. C. Mullikin, M. Slatkin, R. Nielsen, J. Kelso, M. Lachmann, D.  
713           Reich, and S. Paabo. 2010. A draft sequence of the Neandertal genome. *Science* 328:710-  
714           722.
- 715 Grinnell, J., and T. I. Storer. 1924. *Animal Life in the Yosemite. An Account of the Mammals,*  
716           *Birds, Reptiles, and Amphibians in a Cross-section of the Sierra Nevada.* University of  
717           California Press, Berkeley, CA. USA.
- 718 Guo, Y., S. Zhao, Q. Sheng, F. Ye, J. Li, B. Lehmann, J. Pietenpol, D. C. Samuels, and Y. Shyr.  
719           2014. Multi-perspective quality control of Illumina exome sequencing data using QC3.  
720           *Genomics* 103:323-328.
- 721 Hall, E. R. 1981. *The Mammals of North America.* John Wiley & Sons, Inc, New York, NY,  
722           USA.
- 723 Harrison, R. G., and E. L. Larson. 2014. Hybridization, introgression, and the nature of species  
724           boundaries. *J Heredity* 105 Suppl 1:795-809.
- 725 Heller, H. C. 1971. Altitudinal Zonation of Chipmunks (*Eutamias*): Interspecific Aggression.  
726           *Ecology* 52:312-319.

- 727 Hird, S., N. Reid, J. Demboski, and J. Sullivan. 2010. Introgression at differentially aged hybrid  
728 zones in red-tailed chipmunks. *Genetica* 138:869-883.
- 729 Hird, S. and J. Sullivan. 2009. Assessment of gene flow across a hybrid zone in red-tailed  
730 chipmunks (*Tamias ruficaudus*). *Mol Ecol* 18:3097-3109.
- 731 Hoang, D. T., O. Chernomor, A. v. Haeseler, B. Q. Minh, and L. S. Vinh. 2017. UFBoot2:  
732 Improving the Ultrafast Bootstrap Approximation. *Molecular Biology and Evolution*  
733 35:518-522.
- 734 Howell, A. H. 1925. Preliminary Descriptions of Five New Chipmunks from North America.  
735 *Journal of Mammalogy* 6:51-54.
- 736 Jain, M., S. Koren, K. H. Miga, J. Quick, A. C. Rand, T. A. Sasani, J. R. Tyson, A. D. Beggs, A.  
737 T. Dilthey, I. T. Fiddes, S. Malla, H. Marriott, T. Nieto, J. O'Grady, H. E. Olsen, B. S.  
738 Pedersen, A. Rhie, H. Richardson, A. R. Quinlan, T. P. Snutch, L. Tee, B. Paten, A. M.  
739 Phillippy, J. T. Simpson, N. J. Loman, and M. Loose. 2018. Nanopore sequencing and  
740 assembly of a human genome with ultra-long reads. *Nat Biotechnol* 36:338-345.
- 741 Jameson, E. W. 1999. Host-ectoparasite Relationships among North American Chipmunks. *Acta*  
742 *Theriologicala* 44.
- 743 Ji, J., D. J. Jackson, A. D. Leaché, and Z. Yang. 2021. Significant cross-species gene flow  
744 detected in the *Tamias quadrivittatus* group of North American chipmunks. *BioRxiv*.
- 745 Kalyaanamoorthy, S., B. Q. Minh, T. K. F. Wong, A. von Haeseler, and L. S. Jermin. 2017.  
746 ModelFinder: fast model selection for accurate phylogenetic estimates. *Nat Methods*  
747 14:587-589.
- 748 Kubatko, L. S. and J. Chifman. 2019. An invariants-based method for efficient identification of  
749 hybrid species from large-scale genomic data. *BMC Evol Biol* 19:112.
- 750 Kumar, S., A. J. Filipski, F. U. Battistuzzi, S. L. Kosakovsky Pond, and K. Tamura. 2012.  
751 Statistics and truth in phylogenomics. *Mol Biol Evol* 29:457-472.
- 752 Lamichhaney, S., F. Han, M. T. Webster, L. Andersson, B. R. Grant, and P. R. Grant. 2017.  
753 Rapid Hybrid Speciation in Darwin's Finches. *Science* 359:224-228.
- 754 Lawson, D. J., L. van Dorp, and D. Falush. 2018. A tutorial on how not to over-interpret  
755 STRUCTURE and ADMIXTURE bar plots. *Nature Communication* 9:3258.
- 756 Levenson, H., R. S. Hoffmann, C. F. Nadler, L. Deutsch, and S. D. Freeman. 1985. Systematics  
757 of the Holarctic Chipmunks (*Tamias*). *Journal of Mammalogy* 66:219-224.
- 758 Levesque, D. L., and G. J. Tattersall. 2009. Seasonal changes in thermoregulatory responses to  
759 hypoxia in the Eastern chipmunk (*Tamias striatus*). *J Exp Biol* 212:1801-1810.
- 760 Li, H. 2013. Aligning sequence reads, clone sequences and assembly contigs with BWA-MEM.  
761 *arXiv*.
- 762 Li, H., and R. Durbin. 2009. Fast and accurate short read alignment with Burrows-Wheeler  
763 transform. *Bioinformatics* 25:1754-1760.
- 764 Li, H., B. Handsaker, A. Wysoker, T. Fennell, J. Ruan, N. Homer, G. Marth, G. Abecasis, R.  
765 Durbin, and S. Genome Project Data Processing. 2009. The Sequence Alignment/Map  
766 format and SAMtools. *Bioinformatics* 25:2078-2079.
- 767 Luo, A., C. Ling, S. Y. W. Ho, and C. D. Zhu. 2018. Comparison of Methods for Molecular  
768 Species Delimitation Across a Range of Speciation Scenarios. *Syst Biol* 67:830-846.
- 769 McKenna, A., M. Hanna, E. Banks, A. Sivachenko, K. Cibulskis, A. Kernytsky, K. Garimella, D.  
770 Altshuler, S. Gabriel, M. Daly, and M. A. DePristo. 2010. The Genome Analysis Toolkit:  
771 a MapReduce framework for analyzing next-generation DNA sequencing data. *Genome*  
772 *Res* 20:1297-1303.

- 773 Meyer, M., and M. Kircher. 2010. Illumina sequencing library preparation for highly multiplexed  
774 target capture and sequencing. *Cold Spring Harb Protoc* 2010:pdb prot5448.
- 775 Minh, B. Q., M. W. Hahn, and R. Lanfear. 2020a. New Methods to Calculate Concordance  
776 Factors for Phylogenomic Datasets. *Mol Biol Evol* 37:2727-2733.
- 777 Minh, B. Q., M. A. Nguyen, and A. von Haeseler. 2013. Ultrafast approximation for  
778 phylogenetic bootstrap. *Mol Biol Evol* 30:1188-1195.
- 779 Minh, B. Q., H. A. Schmidt, O. Chernomor, D. Schrempf, M. D. Woodhams, A. von Haeseler,  
780 and R. Lanfear. 2020b. IQ-TREE 2: New Models and Efficient Methods for Phylogenetic  
781 Inference in the Genomic Era. *Mol Biol Evol* 37:1530-1534.
- 782 Mirarab, S., M. S. Bayzid, B. Boussau, and T. Warnow. 2014a. Statistical binning enables an  
783 accurate coalescent-based estimation of the avian tree. *Science* 346:1250463.
- 784 Mirarab, S., M. S. Bayzid, and T. Warnow. 2016. Evaluating Summary Methods for Multilocus  
785 Species Tree Estimation in the Presence of Incomplete Lineage Sorting. *Syst Biol*  
786 65:366-380.
- 787 Mirarab, S., R. Reaz, M. S. Bayzid, T. Zimmermann, M. S. Swenson, and T. Warnow. 2014b.  
788 ASTRAL: genome-scale coalescent-based species tree estimation. *Bioinformatics* 30:  
789 i541-548.
- 790 Morales-Briones, D. F., A. Liston, and D. C. Tank. 2018. Phylogenomic analyses reveal a deep  
791 history of hybridization and polyploidy in the Neotropical genus *Lachemilla* (Rosaceae).  
792 *New Phytol* 218:1668-1684.
- 793 Moritz, C., J. L. Patton, C. J. Conroy, J. L. Parra, G. C. White, and S. R. Beissinger. 2008.  
794 Impact of a century of climate change on small-mammal communities in Yosemite  
795 National Park, USA. *Science* 322:261-264.
- 796 Nadler, C. F., and M. H. Block. 1962. The Chromosomes of Some North American Chipmunks  
797 (Sciuridae) Belonging to the Genera *Tamias* and *Eutamias*\*. *Chromosoma* 13:1-15.
- 798 Nagorsen, D. W., N. Panter, and D. Copley. 2020. Phenotypes and distribution of yellow-pine  
799 chipmunk (*Neotamias amoenus*) of hybrid ancestry from the Rocky Mountains of  
800 Canada. *Western North American Naturalist* 81:328-343.
- 801 Nguyen, L. T., H. A. Schmidt, A. von Haeseler, and B. Q. Minh. 2015. IQ-TREE: a fast and  
802 effective stochastic algorithm for estimating maximum-likelihood phylogenies. *Mol Biol*  
803 *Evol* 32:268-274.
- 804 Paradis, E., J. Claude, and K. Strimmer. 2004. APE: Analyses of Phylogenetics and Evolution in  
805 R language. *Bioinformatics* 20:289-290.
- 806 Patterson, B. D. 1981. Morphological Shifts of Some Isolated Populations of *Eutamias*  
807 (Rodentia: Sciuridae) in Different Congeneric Assemblages. *Evolution* 35:53-66.
- 808 Patterson, B. D. 1984. Geographic Variation and Taxonomy of Colorado and Hopi Chipmunks  
809 (Genus *Eutamias*). *Journal of Mammalogy* 65:442-456.
- 810 Patterson, B. D., and L. R. Heaney. 1987. Analysis of Geographic Variation in Red-Tailed  
811 Chipmunks (*Eutamias ruficaudus*). *Journal of Mammalogy* 68:782-791.
- 812 Patterson, B. D., and R. W. Norris. 2016. Towards a uniform nomenclature for ground squirrels:  
813 the status of the Holarctic chipmunks. *Mammalia* 80.
- 814 Patterson, B. D., and C. S. Thaele. 1982. The Mammalian Baculum: Hypotheses on the Nature  
815 of Bacular Variability. *Journal of Mammalogy* 63:1-15.
- 816 Pease, J. B., and M. W. Hahn. 2015. Detection and Polarization of Introgression in a Five-Taxon  
817 Phylogeny. *Syst Biol* 64:651-662.



- 818 Piaggio, A. J. and G. S. Spicer. 2000. Molecular Phylogeny of the Chipmunk Genus *Tamias*  
819 Based on the Mitochondrial Cytochrome Oxidase Subunit II Gene. *Journal of*  
820 *Mammalian Evolution* 7:147-166.
- 821 Piaggio, A. J. and G. S. Spicer. 2001. Molecular phylogeny of the chipmunks inferred from  
822 Mitochondrial cytochrome b and cytochrome oxidase II gene sequences. *Mol Phylogenet*  
823 *Evol* 20:335-350.
- 824 Quinlan, A. R., and I. M. Hall. 2010. BEDTools: a flexible suite of utilities for comparing  
825 genomic features. *Bioinformatics* 26:841-842.
- 826 Rannala, B. and Z. Yang. 2017. Efficient Bayesian Species Tree Inference under the  
827 Multispecies Coalescent. *Systematic Biology* 66:823-842.
- 828 Reid, N., J. R. Demboski, and J. Sullivan. 2012. Phylogeny estimation of the radiation of western  
829 North American chipmunks (*Tamias*) in the face of introgression using reproductive  
830 protein genes. *Syst Biol* 61:44-62.
- 831 Rubidge, E. M., J. L. Patton, and C. Moritz. 2014. Diversification of the Alpine Chipmunk,  
832 *Tamias alpinus*, an alpine endemic of the Sierra Nevada, California. *BMC Evolutionary*  
833 *Biology* 14:1-15.
- 834 Sarver, B. A., J. R. Demboski, J. M. Good, N. Forshee, S. S. Hunter, and J. Sullivan. 2017.  
835 Comparative Phylogenomic Assessment of Mitochondrial Introgression among Several  
836 Species of Chipmunks (*Tamias*). *Genome Biol Evol* 9:7-19.
- 837 Sarver, B. A. J., N. D. Herrera, D. Sneddon, S. S. Hunter, M. L. Settles, Z. Kronenberg, J. R.  
838 Demboski, J. M. Good, and J. Sullivan. 2021. Diversification, Introgression, and  
839 Rampant Cytonuclear Discordance in Rocky Mountains Chipmunks (Sciuridae: *Tamias*).  
840 *Syst Biol*.
- 841 Schultz, N. G., J. Ingels, A. Hillhouse, K. Wardwell, P. L. Chang, J. M. Cheverud, C. Lutz, L.  
842 Lu, R. W. Williams, and M. D. Dean. 2016. The Genetic Basis of Baculum Size and  
843 Shape Variation in Mice. *G3 (Bethesda)* 6:1141-1151.
- 844 Sikes, R. S., & Mammalogists, T. A. C. and U. C. of the American Society of Mammalogists.  
845 2016. Guidelines of the American Society of Mammalogists for the use of wild mammals  
846 in research and education. *Journal of Mammalogy* 97:663-688.
- 847 Simmons, L. W. 2014. Sexual selection and genital evolution. *Austral Entomology* 53:1-17.
- 848 Simmons, L. W., and R. C. Firman. 2013. Experimental evidence for the evolution of the  
849 Mammalian baculum by sexual selection. *Evolution* 68:276-283.
- 850 Struck, T. H., J. L. Feder, M. Bendiksbj, S. Birkeland, J. Cerca, V. I. Gusarov, S. Kistenich, K.  
851 H. Larsson, L. H. Liow, M. D. Nowak, B. Stedje, L. Bachmann, and D. Dimitrov. 2018.  
852 Finding Evolutionary Processes Hidden in Cryptic Species. *Trends Ecol Evol* 33:153-  
853 163.
- 854 Sullivan, J., J. R. Demboski, K. C. Bell, S. Hird, B. Sarver, N. Reid, and J. M. Good. 2014.  
855 Divergence with gene flow within the recent chipmunk radiation (*Tamias*). *Heredity*  
856 113:185-194.
- 857 Sutton, D. A. 1982. The female genital bone of chipmunks. *The Southwestern Naturalist* 27:393-  
858 402.
- 859 Sutton, D. A., and B. D. Patterson. 2000. Geographic Variation of the Western Chipmunks  
860 *Tamias senex* and *T. siskiyou*, with Two New Subspecies from California. *Journal of*  
861 *Mammalogy* 81:299-316.
- 862 Swofford, D. L. 2003. PAUP\*. Phylogenetic Analysis Using Parsimony (\*and Other Methods).  
863 Version 4.0b10. Sinauer Associates.

- 864 Thorington Jr., R. W., J. L. Koprowski, M. A. Steele, and J. F. Wahatton. 2012. Squirrels of the  
865 world. The Johns Hopkins University Press, Baltimore, Maryland.
- 866 Van der Auwera, G. A., M. O. Carneiro, C. Hartl, R. Poplin, G. Del Angel, A. Levy-Moonshine,  
867 T. Jordan, K. Shakir, D. Roazen, J. Thibault, E. Banks, K. V. Garimella, D. Altshuler, S.  
868 Gabriel, and M. A. DePristo. 2013. From FastQ data to high confidence variant calls: the  
869 Genome Analysis Toolkit best practices pipeline. *Curr Protoc Bioinformatics* 43:11 10  
870 11-11 10 33.
- 871 White, J. A. 1953. The baculum in the chipmunks of western North America. University of  
872 Kansas Publications Museum of Natural History 5:611-631.
- 873 Yang, Z. 2015. The BPP program for species tree estimation and species delimitation. *Current*  
874 *Zoology* 61:854–865.
- 875 Yang, Z., and B. Rannala. 2010. Bayesian species delimitation using multilocus sequence data.  
876 *Proc Natl Acad Sci U S A* 107:9264-9269.
- 877 Yu, Y., J. H. Degnan, and L. Nakhleh. 2012. The probability of a gene tree topology within a  
878 phylogenetic network with applications to hybridization detection. *PLoS Genet* 8:  
879 e1002660.
- 880 Yu, Y., J. Dong, K. J. Liu, and L. Nakhleh. 2014. Maximum likelihood inference of reticulate  
881 evolutionary histories. *Proc Natl Acad Sci U S A* 111:16448-16453.
- 882 Yu, Y., and L. Nakhleh. 2015. A maximum pseudo-likelihood approach for phylogenetic  
883 networks. *BMC Genomics* 16:1-10.
- 884 Zhang, C., M. Rabiee, E. Sayyari, and S. Mirarab. 2018. ASTRAL-III: polynomial time species  
885 tree reconstruction from partially resolved gene trees. *BMC Bioinformatics* 19:153.
- 886 Zheng, X., D. Levine, J. Shen, S. M. Gogarten, C. Laurie, and B. S. Weir. 2012. A high-  
887 performance computing toolset for relatedness and principal component analysis of SNP  
888 data. *Bioinformatics* 28:3326-3328.
